# Supplementary material
Source: PubMed Central journal article supplement (PMC509210)

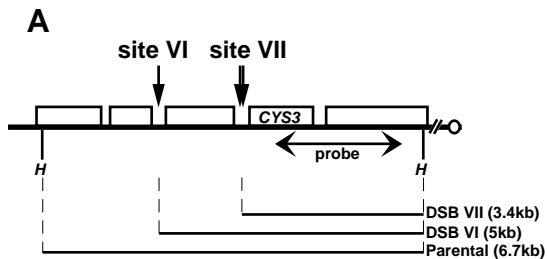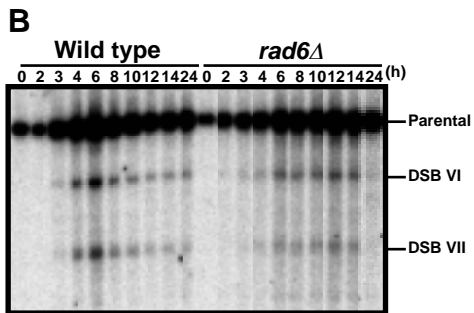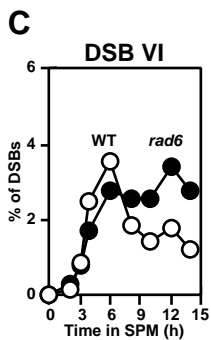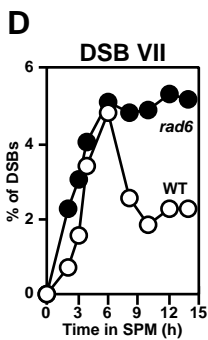

Supplement: pnas_101_31_11380__3.pdf [file pnas_101_31_11380__3.pdf]

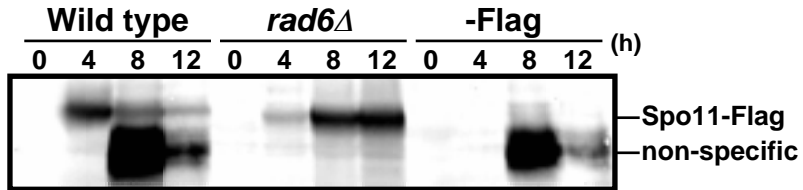

Supplement: pnas_101_31_11380__4.pdf [file pnas_101_31_11380__4.pdf]
